# Supplementary material for: Modulation of the Structure and Stability of Novel Camel Lens Alpha-Crystallin by pH and Thermal Stress
Source: MDPI journal article supplement (doi:10.3390/gels8050273), 2022-04-27
Supplement: s1 [file s1]

# Modulation of the Structure and Stability of Novel Camel Lens Alpha-Crystallin by pH and Thermal Stress

Ajamaluddin Malik <sup>1,\*</sup>, Javed Masood Khan <sup>2</sup>, Abdullah S. Alhomida <sup>1</sup>, Mohammad Shamsul Ola <sup>1</sup>

<sup>1</sup> Department of Biochemistry, College of Science, King Saud University, Riyadh 11451, Saudi Arabia; alhomida@ksu.edu.sa (A.S.A.); mola@ksu.edu.sa (M.S.O.)

<sup>2</sup> Department of Food Science and Nutrition, Faculty of Food and Agricultural Sciences, King Saud University, Riyadh 11451, Saudi Arabia; jmkhan@ksu.edu.sa

\* Correspondence: amalik@ksu.edu.sa

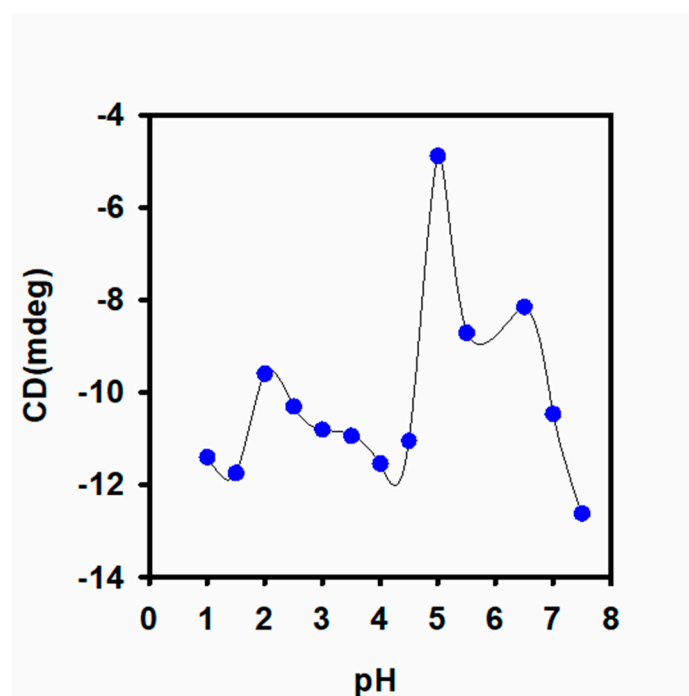

**Figure S1.** Changes in far-UV CD signal at 217 nm at different pH values are plotted. With a decrease in pH, the far-UV CD ellipticities initially decreased between pH 7.5 and 5.0. The far-UV CD ellipticities at 217 nm rapidly increased to a native-like structure below pH 5.0.

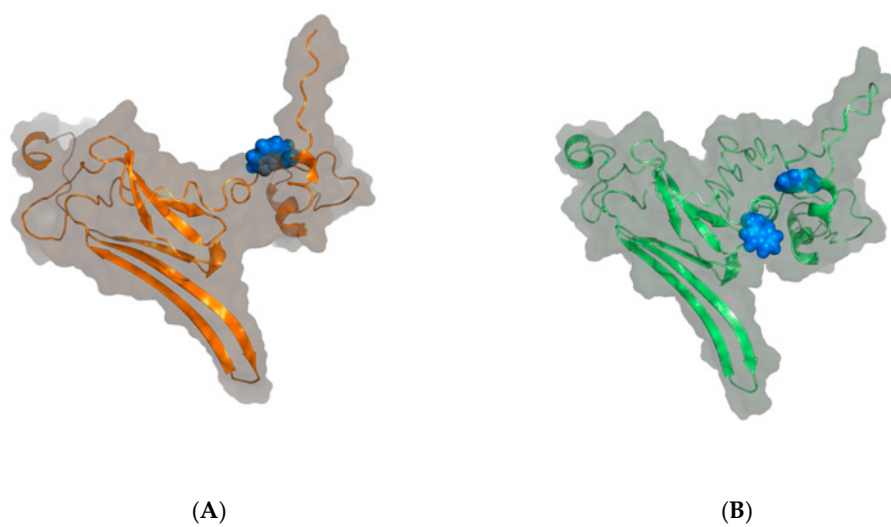

**Figure S2.** Modeled 3D structure of camel lens alpha-crystallin. The tryptophan residue in the A- and B-chain of alpha-crystallin is shown in blue: (A) alphaA-crystallin and (B) alphaB-crystallin.
